# Supplementary material
Source: HighWire-hosted journal article supplement (https://jitc.bmj.com/content/10/2/e003534)

## Supplementary Figure 1. Total cells in each treatment-naïve LUAD sample.

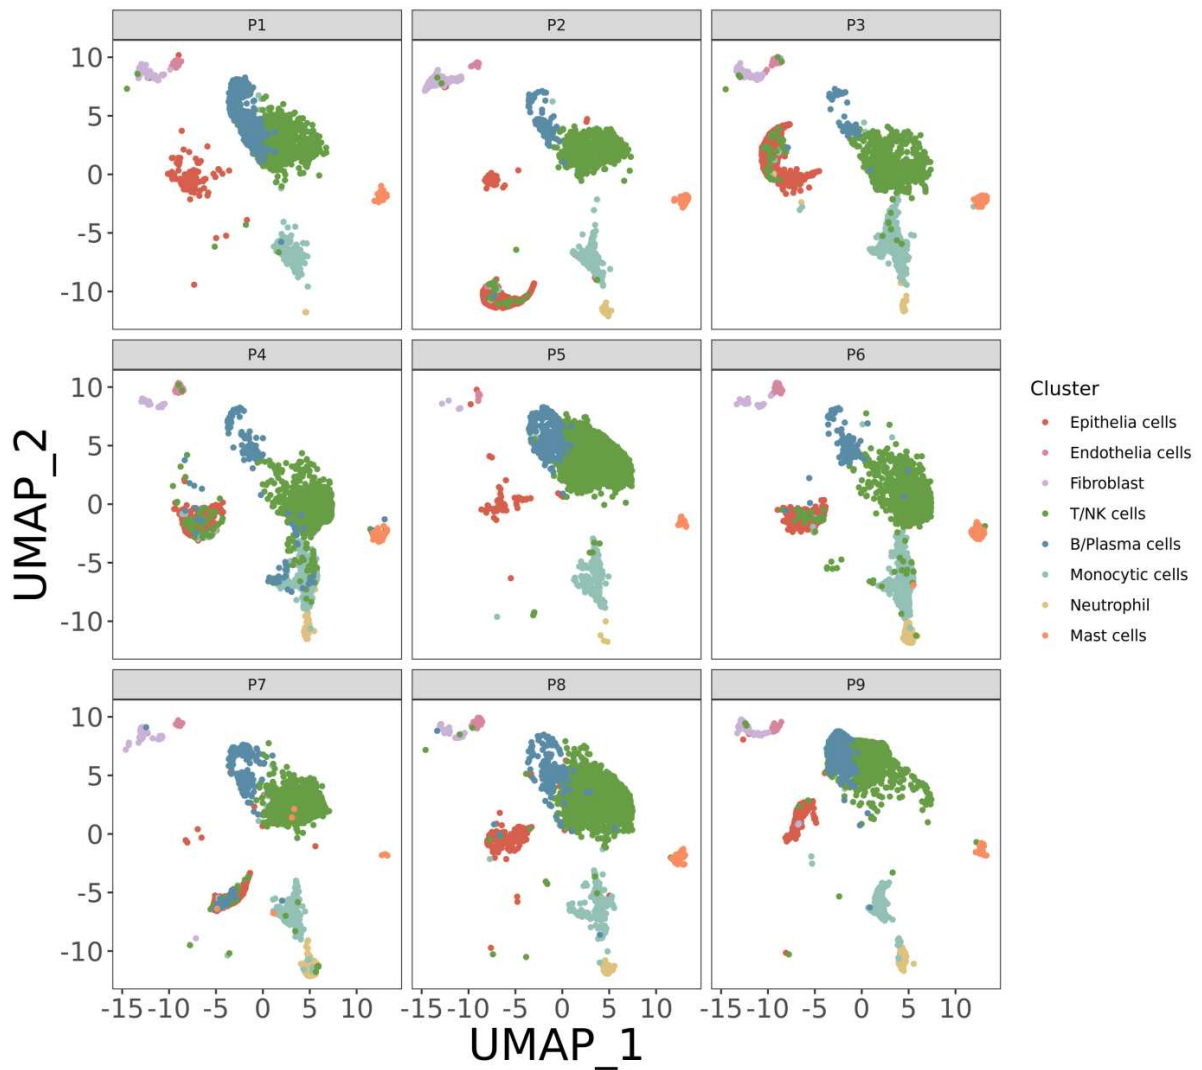

## Supplementary Figure 2. Bubble plot of marker genes of each cell subgroup.

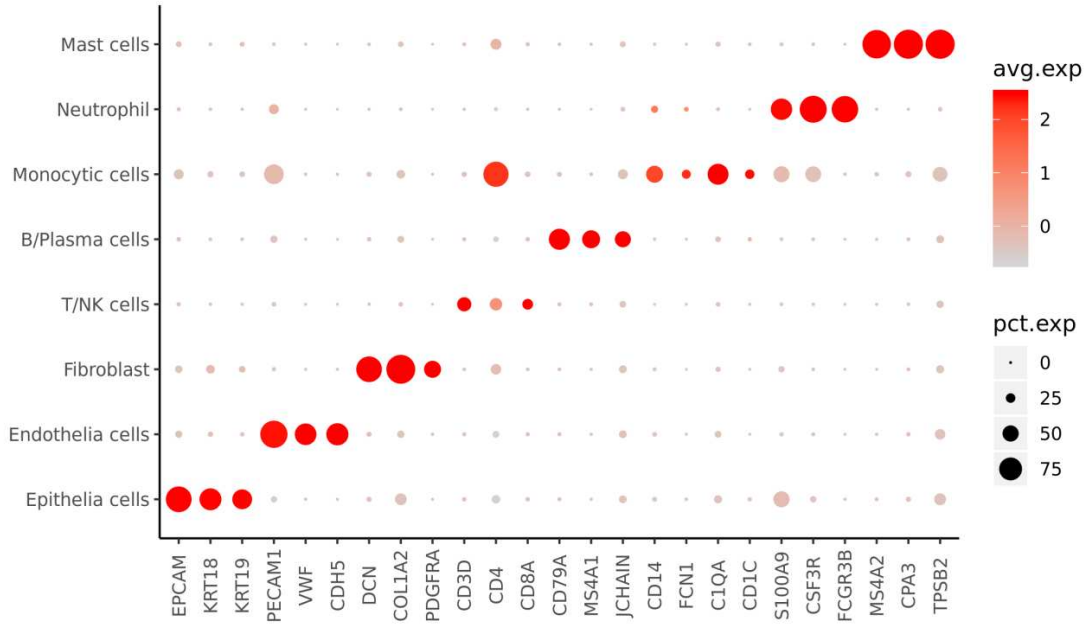

## Supplementary Figure 3. Identification of tumor cells and normal cells from epithelial cells in each treatment-naïve sample.

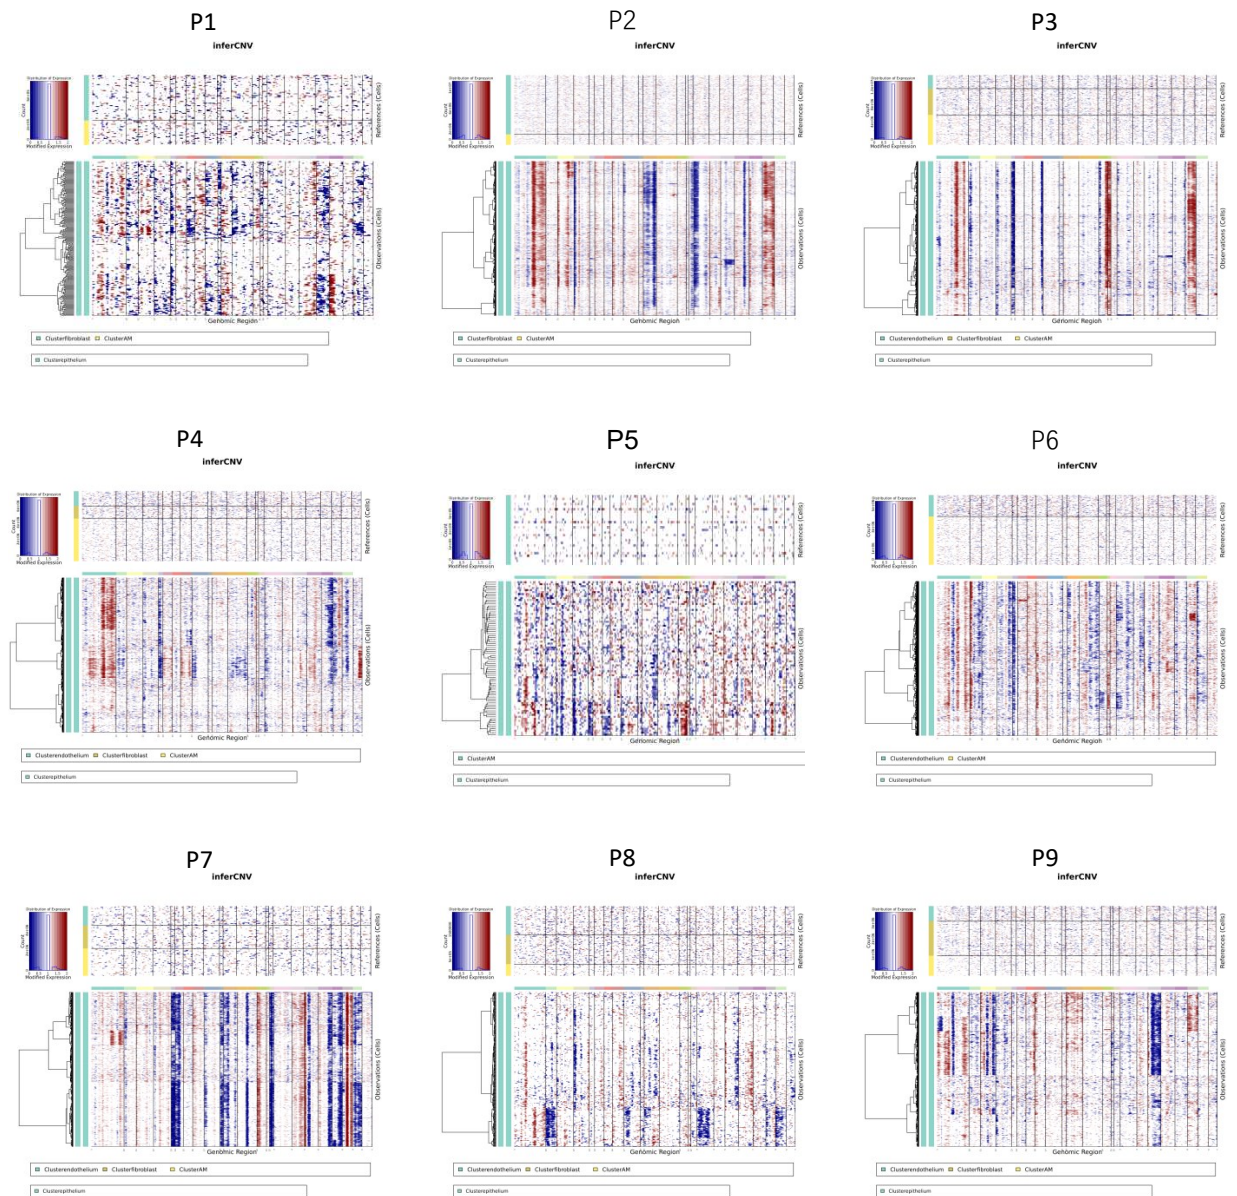

**Supplementary Figure 4. Further clustering of T and NK cells.**

- A. UMAP plot of 19,984 T/NK cells from treatment-naïve samples.
- B. Violin plot of different marker genes for T/NK cell clusters.
- C. UMAP plot of CD8+ T cells from treatment-naïve samples (left). The proportion of each CD8+ T cell cluster in EGFR (-) (pink) and EGFR (+) (cyan) group (middle). UMAP plot of CD8+ T cell from EGFR(-) specific region calculated by DASEq (right).
- D. UMAP plot of CD4+ T cells from treatment-naïve samples (left). The proportion of each CD4+ T cell cluster in EGFR (-) (pink) and EGFR (+) (cyan) group (middle). UMAP plot of CD4+ T cell from EGFR(-) specific region calculated by DASEq (right).
- E. Marker genes of active CD8+ T cell differing in EGFR status.
- F. Expression of PD1, LAG3 and TIM3 protein by CD8+T cells in EGFR (-) and EGFR (+) TME.
- G. Bubble plot of cytokines and interleukin expression by each cluster of CD4+ T cells.

### Supplementary Figure 4 (A-D)

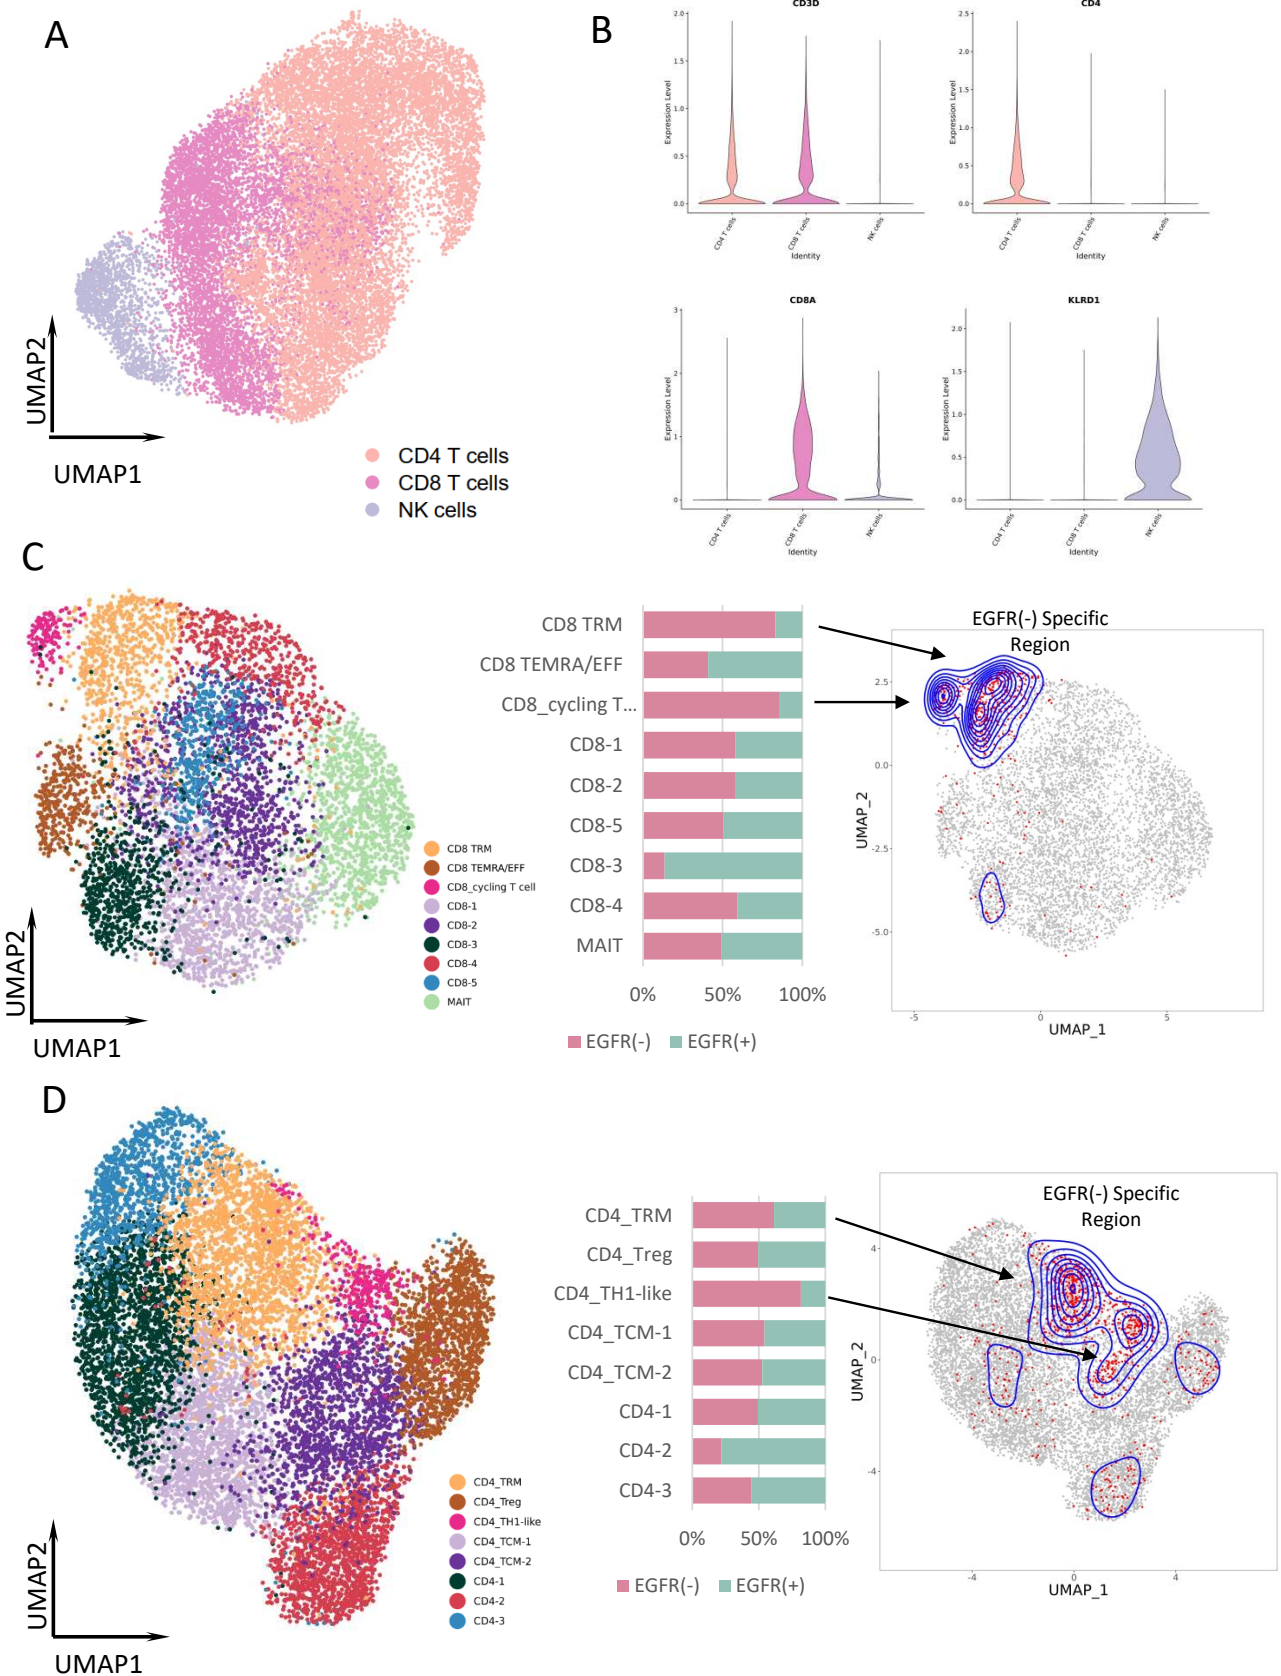

### Supplementary Figure 4 (E-G)

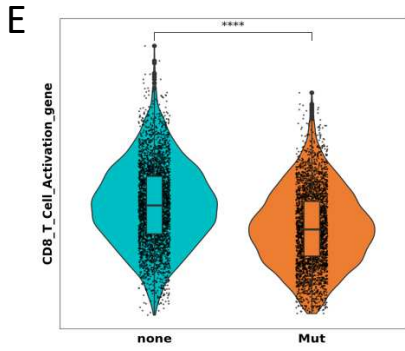

| Subtype of T cells               | Marker gene                                                                                                                                                                                                                                                       |
|----------------------------------|-------------------------------------------------------------------------------------------------------------------------------------------------------------------------------------------------------------------------------------------------------------------|
| Cytotoxic                        | CST7; GZMA; GZMB; IFNG; NKG7; PRF1                                                                                                                                                                                                                                |
| Exhaustion                       | CTLA4; HAVCR2; LAG3; PDCD1; TIGIT                                                                                                                                                                                                                                 |
| CD8+ T Cell Activation gene      | CD69; CCR7; CD27; BTLA; CD40LG; IL2RA; CD3E; CD47; EOMES; GNLY; GZMA; GZMB; PRF1; IFNG; CD8A; CD8B; FASLG; LAMP1; LAG3; CTLA4; HLA-DRA; TNFRSF4; ICOS; TNFRSF9; TNFRSF18                                                                                          |
| Type I Interferon response gene  | IRF1; IFIH1; IFITM3; DDX58; IF144L; IF16; IFITM2; NAMPT; OASL; RTP4; TREX1; ADAR; FAM46C; LY6E; MCOLN2; APOBEC3G; IL15; ISG15; MX1; TLR3                                                                                                                          |
| Type II Interferon Response gene | IFNG; CXCL9; CXCL10; STAT1; CD274; CDKN1A; MYC; SMAD7; IRF1; HLA-A; HLA-B; HLA-C; HLA-E; HLA-F; HLA-G; HLA-K; HLA-L; HLA-L; HLA-DMA; HLA-DOA; HLA-DPA1; HLA-DQA1; HLA-DRA; HLA-DMB; HLA-DOB; HLA-DPB1; HLA-DQA2; HLA-DRB1; HLA-DQB1; HLA-DRB3; HLA-DQB2; HLA-DRB4 |

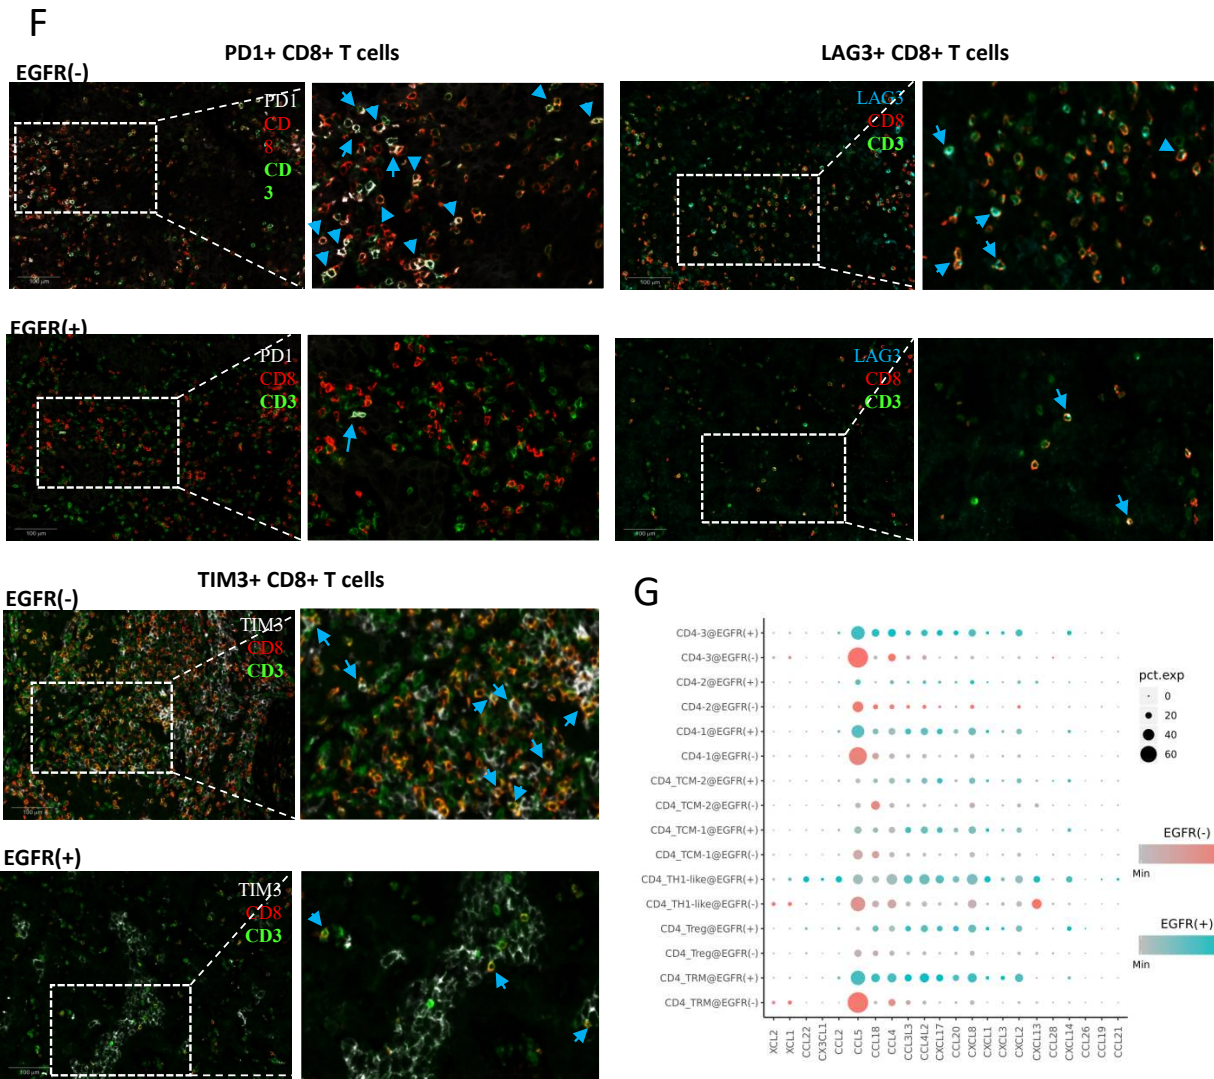

## Supplementary Figure 5. Further clustering of monocytic cells and TAM clusters in each sample.

- UMAP plot of 4,429 monocytic cells from treatment-naïve samples.
- The proportion of monocytes in EGFR (-) (pink) and EGFR (+) (cyan) group.
- TAM clusters identified in each LUAD sample.

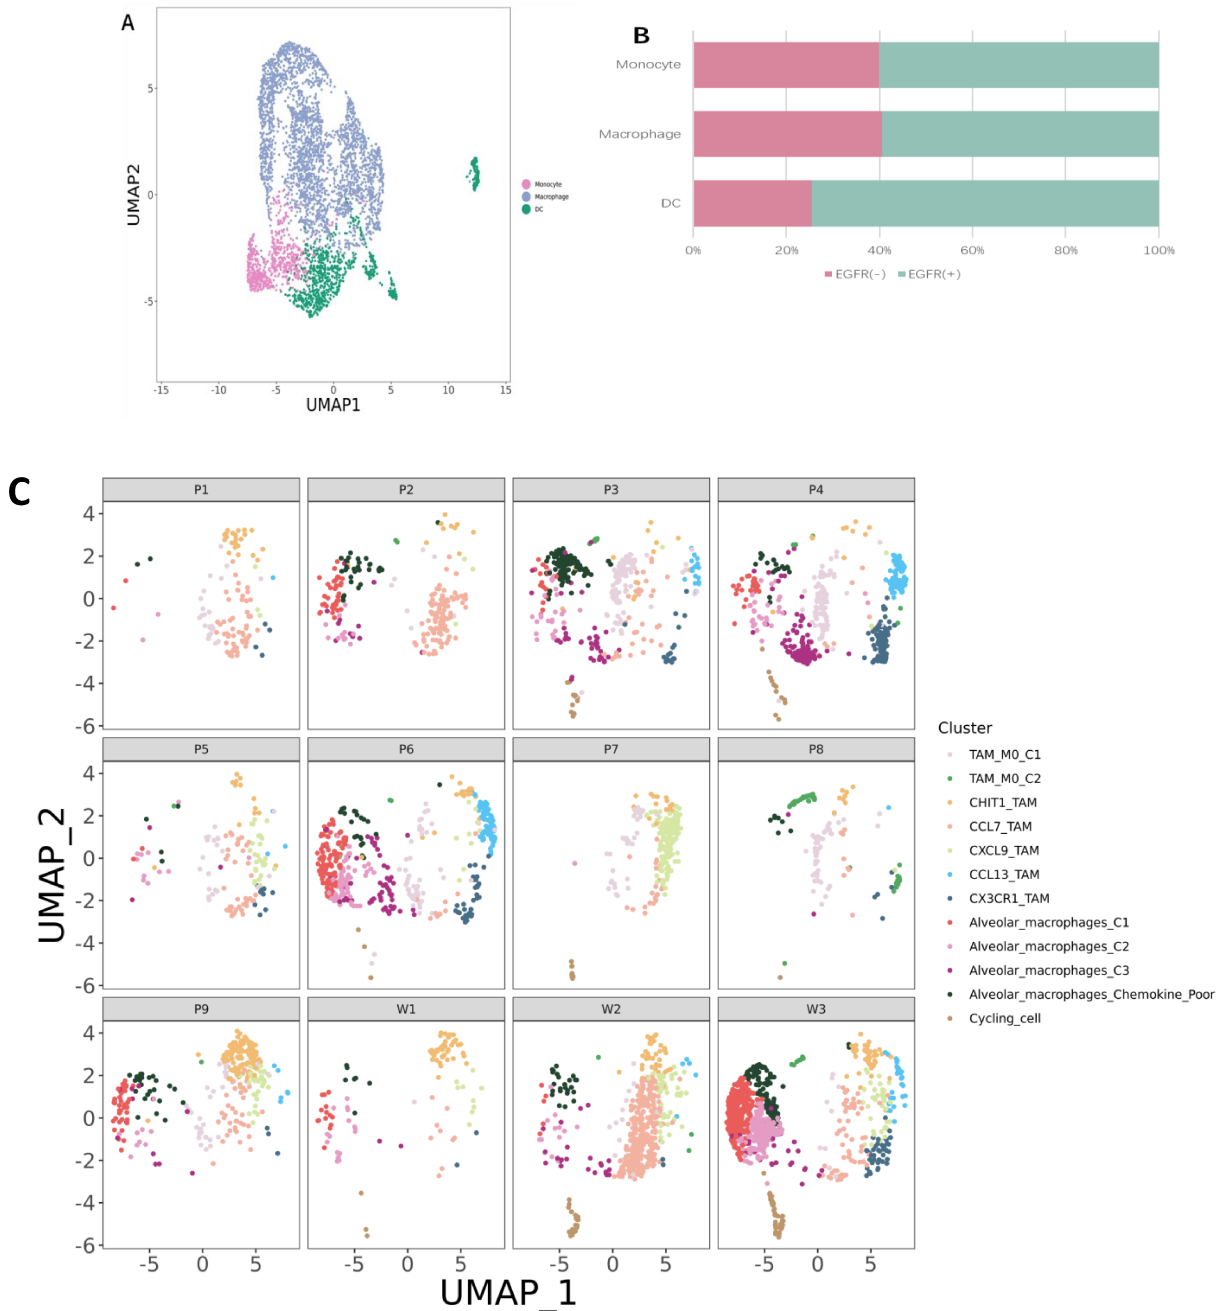

## Supplementary Figure 6. CAFs identified in treatment-naïve and post-treatment samples.

- UMAP plot of pooled fibroblast and endothelial cells in both treatment-naïve and post-treatment samples.
- UMAP plot of pooled fibroblast and endothelial cells from post-ICI responder, post-ICI non-responder, treatment-naïve samples, respectively.
- Bubble plot of MSC marker genes and TGF- $\beta$  expressed by CAFs in treatment-naïve samples.

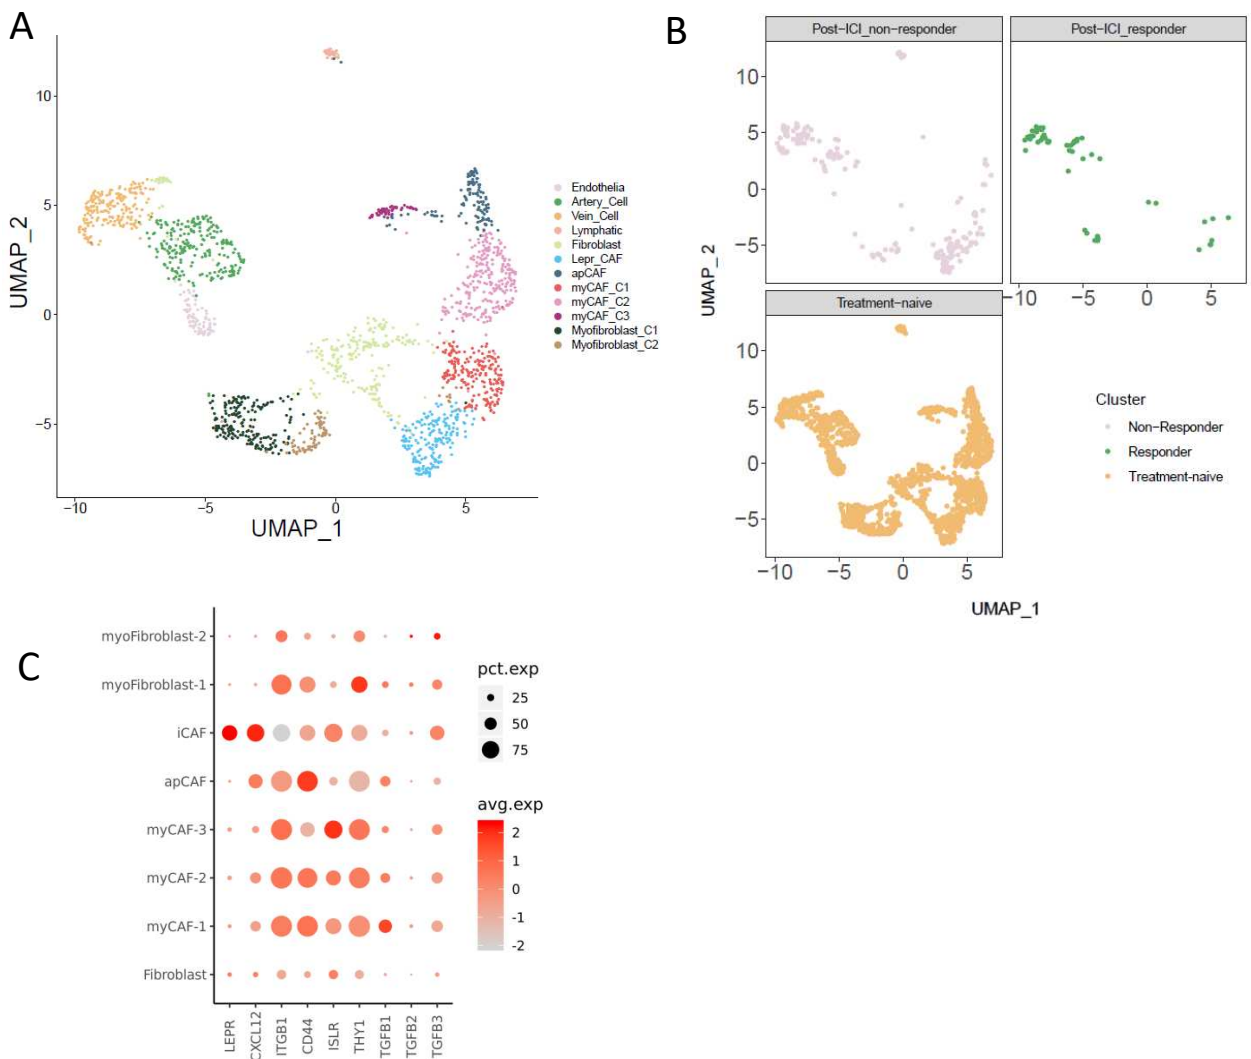



## Supplementary Figure 7. Dendritic cells identified in the TME.

- UMAP plot of 839 DCs from treatment-naïve samples.
- Expression of marker genes for different DC types.
- The proportion of each DC cluster in EGFR (-) (pink) and EGFR (+) (cyan) group.
- The distribution of CD1C+ DCs in the tumor stromal area of EGFR (-) and EGFR (+) TME.
- Bubble plot of cytokine expression among DCs clusters from different group.

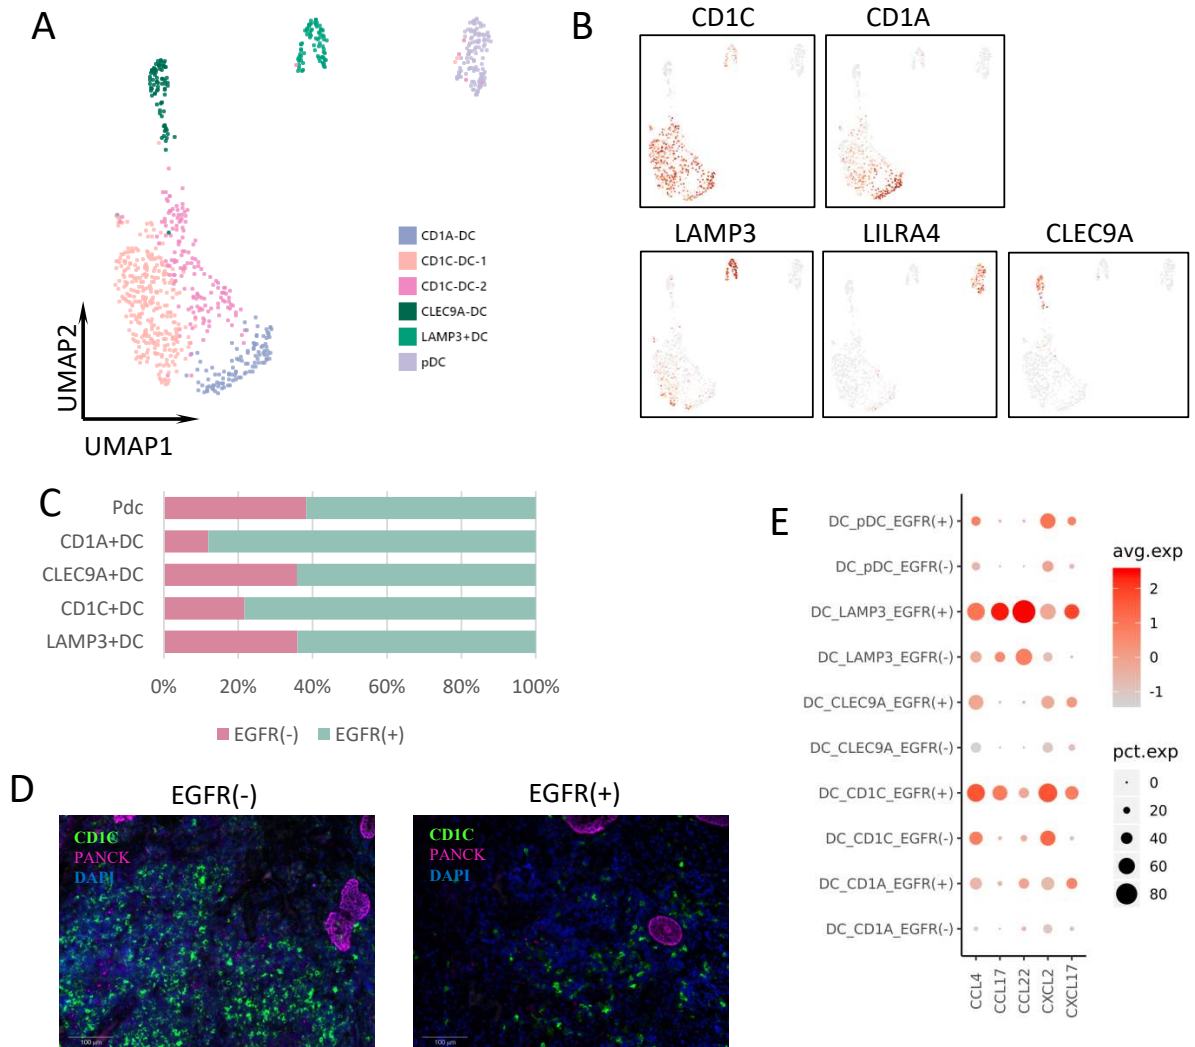

## Supplementary Figure 8. Neutrophil, endothelial and mast cells identified in the TME.

- Volcano map of genes upregulated and downregulated in neutrophils of EGFR (+) samples.
- UMAP plot of 491 endothelial cells from treatment-naïve samples.
- Expression of marker genes for different endothelial clusters.
- The proportion of each endothelial cell cluster in EGFR (-) (pink) and EGFR (+) (cyan) group.
- Bubble plot of cytokine expression among endothelial cell clusters from different groups.
- Bubble plot showing the most prevalent genes expressed in mast cells.

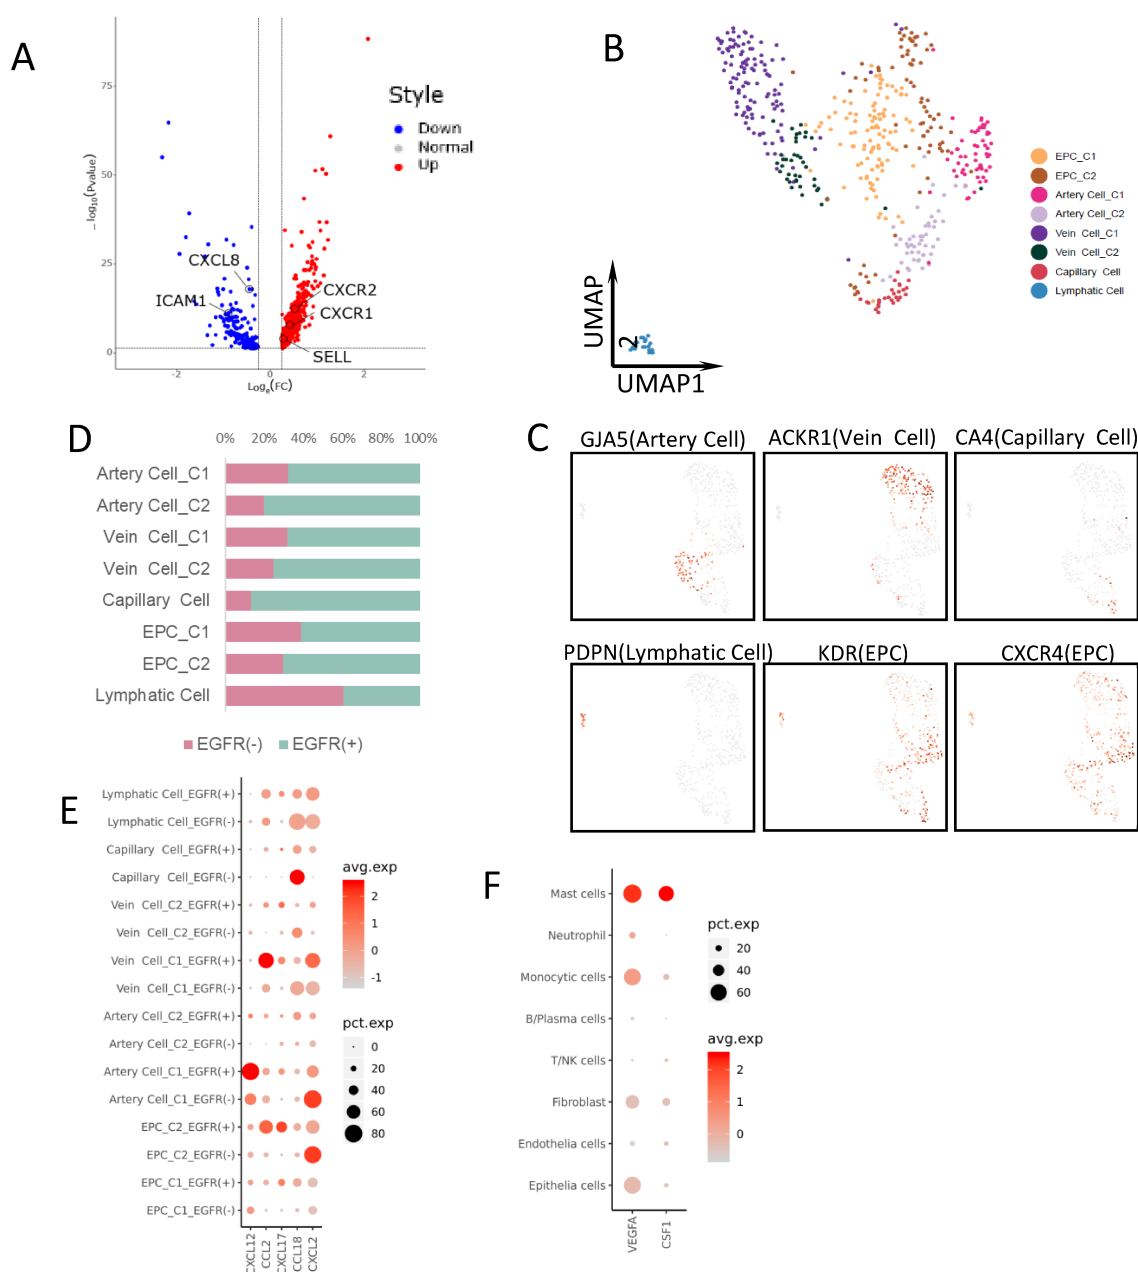

Supplement: inline-supplementary-material-3 [file inline-supplementary-material-3.pdf]
